# Supplementary material
Source: Springer Nature journal article supplement (https://www.springermedizin.de/resource/supplementary/12879_2012_2620_MOESM3_ESM.pdf/9444952)

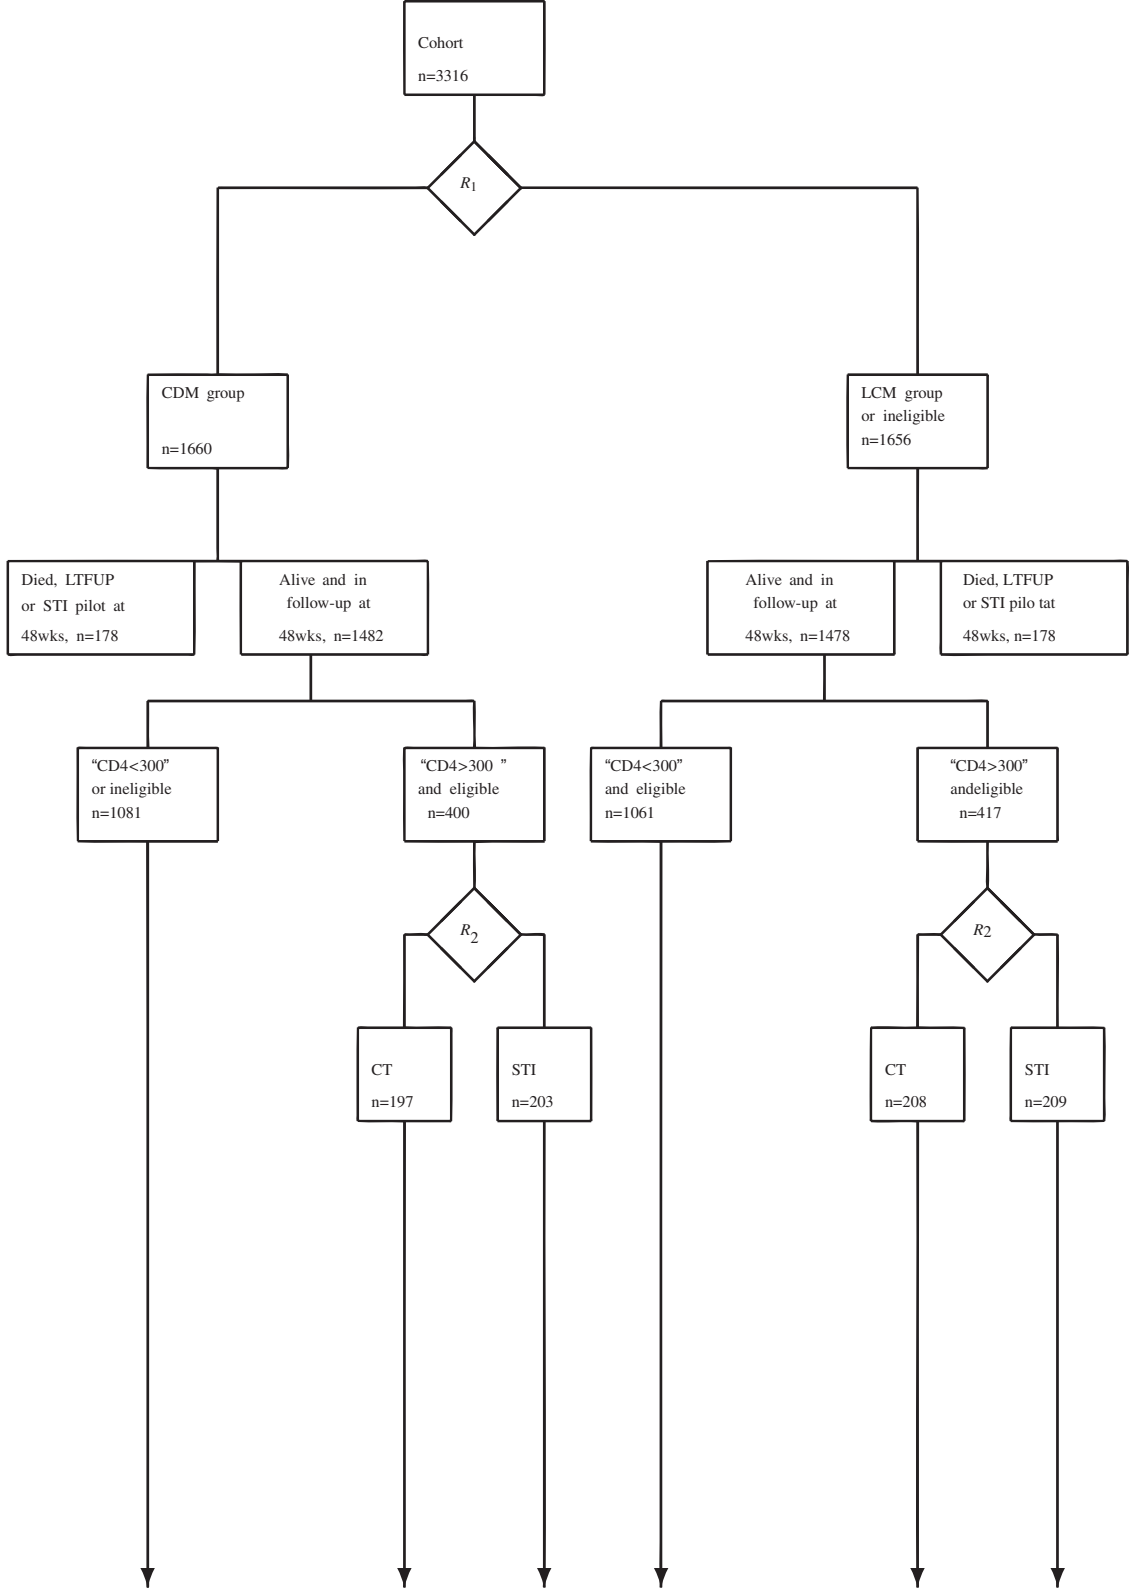

Week 48/72

Supplement: MOESM3 [file 9444952]
